# Supplementary material
Source: PubMed Central journal article supplement (PMC6970925)
Supplement: supp_RA119.011349_156268_2_supp_422589_q02k73.pdf [file supp_RA119.011349_156268_2_supp_422589_q02k73.pdf]

## Supporting Information

### Triple cell lineage tracing by a dual reporter on a single allele

Kuo Liu, Muxue Tang, Hengwei Jin, Qiaozhen Liu, Lingjuan He, Huan Zhu, Xiuxiu Liu, Ximeng Han, Yan Li, Libo Zhang, Juan Tang, Wenjuan Pu, Zan Lv, Haixiao Wang, Hongbin Ji, Bin Zhou\*

**Table S1. The insulator sequence.**

|                                                                                                                                                                                                                                                                                                                                                                                                                                                                                                                                                                                                                                                                                                                                                                                                                                                                                                                                                                                                                                                                                                                                                                                                                                        |
|----------------------------------------------------------------------------------------------------------------------------------------------------------------------------------------------------------------------------------------------------------------------------------------------------------------------------------------------------------------------------------------------------------------------------------------------------------------------------------------------------------------------------------------------------------------------------------------------------------------------------------------------------------------------------------------------------------------------------------------------------------------------------------------------------------------------------------------------------------------------------------------------------------------------------------------------------------------------------------------------------------------------------------------------------------------------------------------------------------------------------------------------------------------------------------------------------------------------------------------|
| The insulator sequence                                                                                                                                                                                                                                                                                                                                                                                                                                                                                                                                                                                                                                                                                                                                                                                                                                                                                                                                                                                                                                                                                                                                                                                                                 |
| gccccatcctcactgactccgtcctggagtggatgagagataatggccttacgtgtgccagggagggtcgggctggatttagcaagatttaccttc<br>tccaaagagcgggtgctgcagtggcacagctgccacggaggtgggggggtcacctgcctggaggtgatgaagaactgtggggatgtggcactg<br>agggacatggccagtgggcacgggtgggtgggtgggtggtcttggggatcttgaggggctttccagccttcatgattgacgattgtatgaacatc<br>tacatggcaattctcagctgcctgtcccagtcctactgaccagctgtatctctccaggcaagcttccacccttctgcttgcacccagacacatca<br>aacatgcaggctcagacacaggaccagcagtgtctgtggccttttggctcctctccatgctgggttfaactgctctttgccttctatcctatcttta<br>tccttaaggtgttctgaacgctgtgactggagagtgtcccagagccctcaacacctgcatgtcccagctccatgctgtcctgcacttctatccccc<br>gatctgcctctccgtagcactgaattggcaaacatgtgtcaccagaccaacaatgtcacagcaaacctcccctttagaggacaaggggaatg<br>gctttacactgagacaggggaggttgggtggatagaggagcagttttccccagagggtgtgacgcactgaacaggttggccaaggaggct<br>gtggatgccccatccctgcaggcattcaagccaggctggatgtgctctgggcagcctgggctgctggtgatgacctgcacatagcagggggt<br>tgatctggatgagcactgtgctccttgaaccaggccgttctatgattctgtcattctaatctcttccagcctaaagcttttccccgatccccc<br>gggtgtcagcagctcaagagcagcgagaagcgttcagaggaaagcagatccctgccaccttcccgtgcccgggctgtcccgcacgctgccg<br>gctcggggatgcggggggagcggaccggagcggagccccggcgggctcgtgctgctgcccctagcgggggaggacgtaattacatcct<br>gggggcttgggggggggctgtccc |

### Figure legend

**Figure S1. No cross talk between Cre-loxP and Dre-rox recombination.** (A) Immunostaining for ZsGreen, tdTomato and TNNI3 on E16.5 *Tnni3-Dre;R26-TLR* heat section shows TNNI3<sup>+</sup> cardiomyocytes are ZsGreen<sup>+</sup> (arrowheads). No tdTomato<sup>+</sup> cells detected. (B) Immunostaining for ZsGreen, tdTomato and PECAM on E16.5 *Tie2-Cre;R26-TLR* heat section shows PECAM<sup>+</sup> endothelial cells are tdTomato<sup>+</sup> (arrowheads). No ZsGreen<sup>+</sup> cells detected. LV, left ventricle; RV, right ventricle; VS, ventricular septum. Yellow bars, 1mm; white bars, 100  $\mu$ m. Each image is representative of five individual samples.

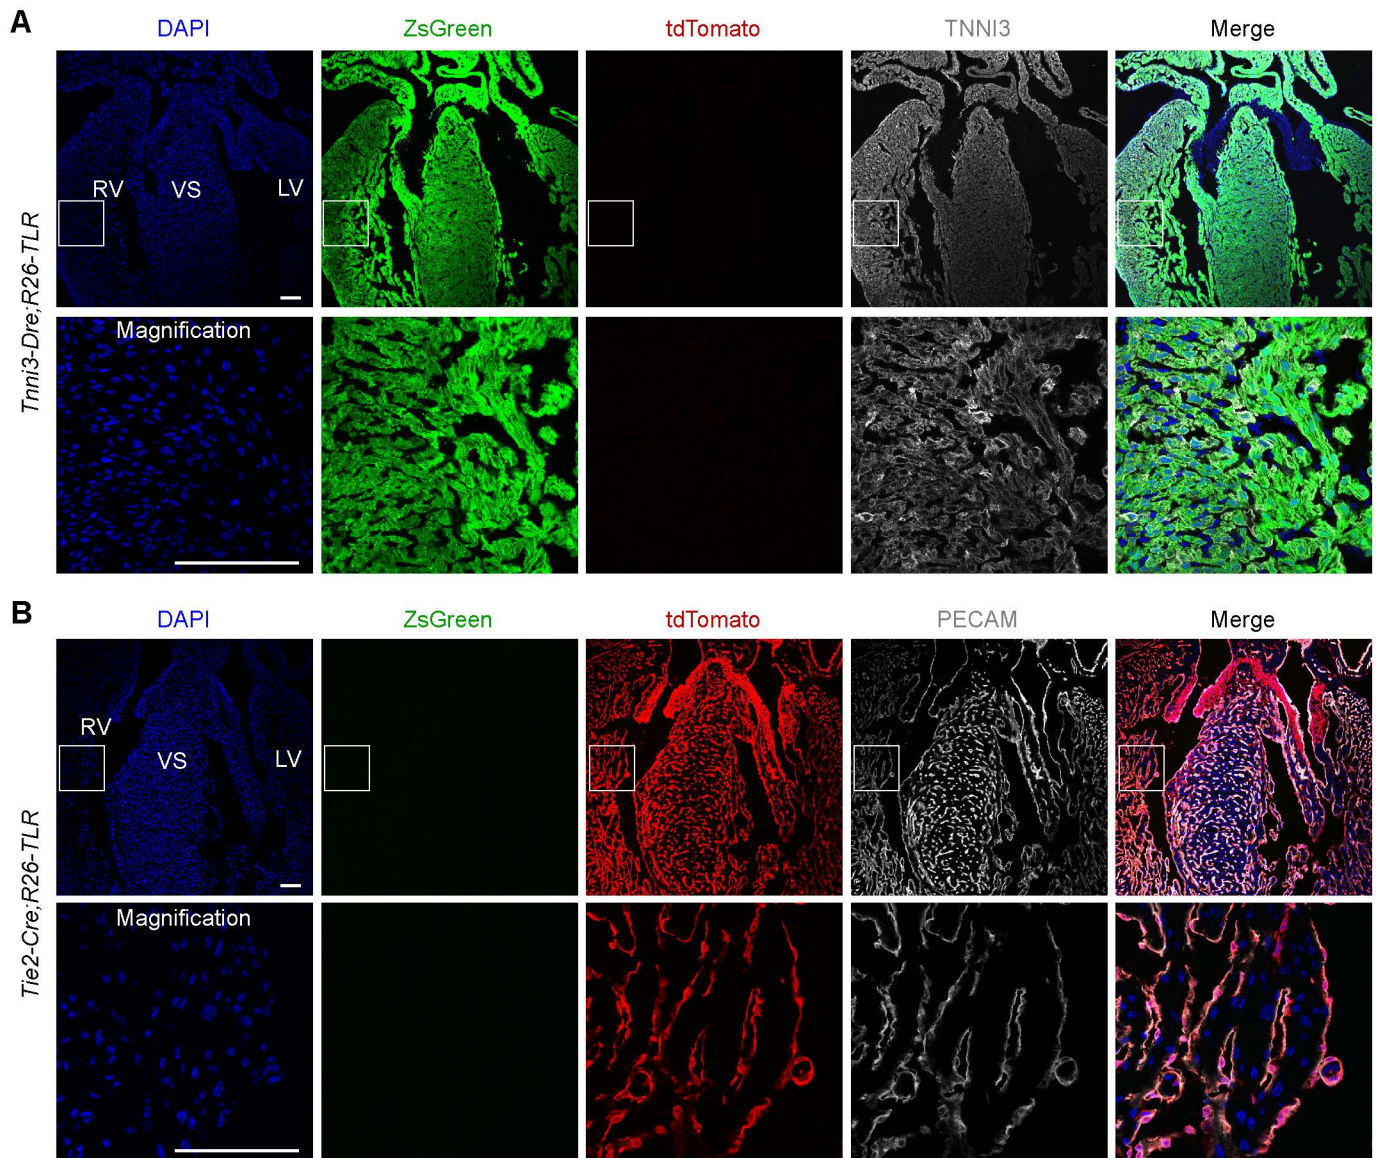

**Figure S1. No cross talk between Cre-loxP and Dre-rox recombination.** (A) Immunostaining for ZsGreen, tdTomato and TNNI3 on E16.5 *Tnni3-Dre;R26-TLR* heat section shows TNNI3<sup>+</sup> cardiomyocytes are ZsGreen<sup>+</sup> (arrowheads). No tdTomato<sup>+</sup> cells detected. (B) Immunostaining for ZsGreen, tdTomato and PECAM on E16.5 *Tie2-Cre;R26-TLR* heat section shows PECAM<sup>+</sup> endothelial cells are tdTomato<sup>+</sup> (arrowheads). No ZsGreen<sup>+</sup> cells detected. LV, left ventricle; RV, right ventricle; VS, ventricular septum. White bars, 100  $\mu$ m. Each image is representative of five individual samples.
